# Supplementary material
Source: MDPI journal article supplement (https://www.mdpi.com/2037-0164/14/4/83)
Supplement: s1 [file s1]

Table S2. Effect of different salts on electrical conductivity, Na<sup>+</sup> concentration and K<sup>+</sup> concentration in different parts of *Limonium sinuatum* plants.

| Treatment                                                                    | Dry Leaves   | Large Leaves  | Middle Leaves | New Leaves    | Roots       | Flower Stalks | Flowers    |
|------------------------------------------------------------------------------|--------------|---------------|---------------|---------------|-------------|---------------|------------|
| Limonium sinuatum Blue Electrical Conductivity (mS m <sup>-1</sup> )         |              |               |               |               |             |               |            |
| Control                                                                      | 178 ± 7 d    | 72 ± 6 e      | 58 ± 3 e      | 70 ± 1 d      | 37 ± 2 c    | —             | —          |
| NaCl                                                                         | 414 ± 7 b    | 328 ± 7 b     | 229 ± 18 b    | 129 ± 2 b     | 76 ± 3 a    | —             | —          |
| KCl                                                                          | 513 ± 13 a   | 483 ± 8 a     | 314 ± 16 a    | 152 ± 5 a     | 85 ± 4 a    | —             | —          |
| NaHCO <sub>3</sub>                                                           | 268 ± 17 c   | 164 ± 6 d     | 138 ± 6 d     | 109 ± 2 c     | 18 ± 1 d    | —             | —          |
| NaNO <sub>3</sub>                                                            | 379 ± 11 b   | 262 ± 42 bc   | 200 ± 14 bc   | 118 ± 6 bc    | 60 ± 2 b    | —             | —          |
| Na <sub>2</sub> HPO <sub>4</sub>                                             | 266 ± 8 c    | 182 ± 11 cd   | 153 ± 12 cd   | 106 ± 4 c     | 29 ± 2 c    | —             | —          |
| Na <sub>2</sub> SO <sub>4</sub>                                              | 311 ± 8 c    | 241 ± 16 cd   | 149 ± 5 cd    | 116 ± 6 bc    | 54 ± 1 b    | —             | —          |
| Limonium sinuatum Yellow Electrical Conductivity (mS m <sup>-1</sup> )       |              |               |               |               |             |               |            |
| Control                                                                      | 88 ± 9 d     | 58 ± 3 d      | 49 ± 4 d      | 46 ± 3 c      | 41 ± 3 c    | 56 ± 4 d      | 44 ± 1 c   |
| NaCl                                                                         | 234 ± 14 bc  | 234 ± 19 b    | 168 ± 7 c     | 115 ± 5 b     | 69 ± 5 b    | 94 ± 13 bcd   | 67 ± 5 bc  |
| KCl                                                                          | 299 ± 16 a   | 338 ± 20 a    | 286 ± 15 a    | 208 ± 13 a    | 73 ± 3 ab   | 198 ± 18 a    | 116 ± 5 a  |
| NaHCO <sub>3</sub>                                                           | 122 ± 5 d    | 115 ± 5 c     | 122 ± 12 c    | 73 ± 4 c      | 29 ± 7 c    | 58 ± 1 cd     | —          |
| NaNO <sub>3</sub>                                                            | 286 ± 27 ab  | 290 ± 19 ab   | 260 ± 21 ab   | 123 ± 7 b     | 92 ± 7 a    | 122 ± 9 b     | 95 ± 18 ab |
| Na <sub>2</sub> HPO <sub>4</sub>                                             | 216 ± 7 c    | 164 ± 3 c     | 139 ± 4 c     | 124 ± 10 b    | 27 ± 1 c    | 106 ± 4 bc    | 88 ± 6 ab  |
| Na <sub>2</sub> SO <sub>4</sub>                                              | 310 ± 7 a    | 255 ± 6 b     | 218 ± 2 b     | 135 ± 8 b     | 70 ± 1 b    | 95 ± 8 bcd    | 86 ± 7 b   |
| Limonium sinuatum Blue Na <sup>+</sup> Concentration (g kg <sup>-1</sup> )   |              |               |               |               |             |               |            |
| Control                                                                      | 8.3 ± 0.3 d  | 5.3 ± 0.4 d   | 3.2 ± 0.4 c   | 1.8 ± 0.0 c   | 2.9 ± 0.2 c | —             | —          |
| NaCl                                                                         | 59.3 ± 2.3 b | 73.1 ± 2.3 a  | 35.9 ± 5.1 a  | 6.9 ± 0.7 b   | 6.9 ± 0.4 a | —             | —          |
| KCl                                                                          | 2.9 ± 0.1 d  | 1.9 ± 0.2 d   | 1.3 ± 0.1 c   | 0.7 ± 0.1 c   | 0.8 ± 0.0 d | —             | —          |
| NaHCO <sub>3</sub>                                                           | 41.7 ± 2.0 c | 29.3 ± 0.6 c  | 21.6 ± 1.5 b  | 11.8 ± 1.0 a  | 3.0 ± 0.1 c | —             | —          |
| NaNO <sub>3</sub>                                                            | 70.5 ± 4.8 a | 79.4 ± 7.3 a  | 32.9 ± 2.5 a  | 10.1 ± 1.1 ab | 7.6 ± 0.2 a | —             | —          |
| Na <sub>2</sub> HPO <sub>4</sub>                                             | 41.4 ± 2.0 c | 35.8 ± 2.7 bc | 28.8 ± 3.1 ab | 12.0 ± 1.6 a  | 5.6 ± 0.3 b | —             | —          |
| Na <sub>2</sub> SO <sub>4</sub>                                              | 56.1 ± 3.3 b | 43.0 ± 1.3 b  | 20.0 ± 1.1 b  | 8.8 ± 0.6 ab  | 7.6 ± 0.5 a | —             | —          |
| Limonium sinuatum Yellow Na <sup>+</sup> Concentration (g kg <sup>-1</sup> ) |              |               |               |               |             |               |            |

| Treatment                                                                                          | Dry Leaves     | Large Leaves  | Middle Leaves  | New Leaves     | Roots         | Flower Stalks | Flowers     |
|----------------------------------------------------------------------------------------------------|----------------|---------------|----------------|----------------|---------------|---------------|-------------|
| Control                                                                                            | 4.6 ± 0.7 d    | 4.8 ± 1.3 e   | 2.5 ± 0.7 d    | 2.5 ± 0.8 b    | 9.6 ± 0.9 c   | 1.2 ± 0.1 b   | 0.9 ± 0.0 b |
| NaCl                                                                                               | 59.9 ± 5.9 b   | 62.8 ± 4.5 b  | 54.7 ± 7.9 b   | 25.8 ± 4.9 a   | 18.3 ± 2.1 b  | 13.0 ± 2.7 a  | 2.5 ± 0.3 b |
| KCl                                                                                                | 3.3 ± 0.2 d    | 3.5 ± 0.2 e   | 3.0 ± 0.2 d    | 1.8 ± 0.1 b    | 1.4 ± 0.1 d   | 1.7 ± 0.1 b   | 1.3 ± 0.1 b |
| NaHCO <sub>3</sub>                                                                                 | 29.6 ± 0.5 c   | 25.5 ± 2.7 d  | 20.0 ± 1.6 c   | 17.4 ± 1.2 a   | 6.8 ± 2.1 cd  | 4.8 ± 1.0 ab  | –           |
| NaNO <sub>3</sub>                                                                                  | 85.0 ± 9.6 a   | 87.5 ± 7.0 a  | 79.3 ± 7.4 a   | 22.3 ± 5.3 a   | 25.7 ± 2.6 a  | 12.2 ± 2.1 a  | 7.1 ± 0.4 a |
| Na <sub>2</sub> HPO <sub>4</sub>                                                                   | 26.8 ± 2.3 c   | 26.5 ± 0.8 d  | 21.3 ± 2.0 c   | 13.6 ± 1.8 ab  | 6.5 ± 0.2 cd  | 6.5 ± 0.9 ab  | 1.7 ± 0.0 b |
| Na <sub>2</sub> SO <sub>4</sub>                                                                    | 42.8 ± 0.4 bc  | 45.6 ± 2.2 c  | 35.3 ± 1.1 c   | 14.4 ± 1.9 ab  | 20.3 ± 0.3 ab | 6.1 ± 1.6 ab  | 3.2 ± 1.3 b |
| <i>Limonium sinuatum</i> Blue K <sup>+</sup> Concentration (g kg <sup>-1</sup> )                   |                |               |                |                |               |               |             |
| Control                                                                                            | 37 ± 2 b       | 10 ± 1 bc     | 10 ± 1 c       | 14 ± 1 d       | 6 ± 0 b       | –             | –           |
| NaCl                                                                                               | 39 ± 2 b       | 20 ± 1 b      | 22 ± 2 b       | 22 ± 1 b       | 11 ± 1 b      | –             | –           |
| KCl                                                                                                | 194 ± 13 a     | 152 ± 7 a     | 103 ± 5 a      | 38 ± 1 a       | 31 ± 3 a      | –             | –           |
| NaHCO <sub>3</sub>                                                                                 | 23 ± 1 bc      | 9 ± 1 bc      | 9 ± 2 c        | 12 ± 1 e       | 1 ± 0 c       | –             | –           |
| NaNO <sub>3</sub>                                                                                  | 30 ± 1 bc      | 7 ± 1 bc      | 10 ± 1 c       | 17 ± 1 c       | 6 ± 0 b       | –             | –           |
| Na <sub>2</sub> HPO <sub>4</sub>                                                                   | 16 ± 3 c       | 7 ± 1 c       | 8 ± 1 c        | 11 ± 0 e       | 1 ± 0 c       | –             | –           |
| Na <sub>2</sub> SO <sub>4</sub>                                                                    | 22 ± 2 bc      | 13 ± 2 bc     | 14 ± 1 bc      | 15 ± 1 d       | 5 ± 1 b       | –             | –           |
| <i>Limonium sinuatum</i> Yellow K <sup>+</sup> Concentration (g kg <sup>-1</sup> )                 |                |               |                |                |               |               |             |
| Control                                                                                            | 40 ± 7 b       | 18 ± 2 b      | 14 ± 2 b       | 16 ± 1 bc      | 3 ± 1 b       | 21 ± 2 b      | 18 ± 1 c    |
| NaCl                                                                                               | 43 ± 9 b       | 18 ± 3 b      | 15 ± 3 b       | 29 ± 3 b       | 2 ± 0 b       | 25 ± 3 b      | 30 ± 3 b    |
| KCl                                                                                                | 197 ± 16 a     | 254 ± 23 a    | 210 ± 15 a     | 126 ± 10 a     | 29 ± 2 a      | 121 ± 10 a    | 63 ± 3 a    |
| NaHCO <sub>3</sub>                                                                                 | 32 ± 6 b       | 9 ± 1 b       | 8 ± 1 b        | 18 ± 2 bc      | 1 ± 0 b       | 22 ± 0 b      | –           |
| NaNO <sub>3</sub>                                                                                  | 37 ± 2 b       | 13 ± 2 b      | 12 ± 2 b       | 24 ± 2 bc      | 6 ± 3 b       | 15 ± 2 b      | 19 ± 0 bc   |
| Na <sub>2</sub> HPO <sub>4</sub>                                                                   | 29 ± 2 b       | 12 ± 1 b      | 10 ± 1 b       | 11 ± 2 c       | 1 ± 0 b       | 19 ± 1 b      | 25 ± 1 bc   |
| Na <sub>2</sub> SO <sub>4</sub>                                                                    | 35 ± 2 b       | 15 ± 2 b      | 15 ± 1 b       | 17 ± 1 bc      | 1 ± 0 b       | 18 ± 2 b      | 17 ± 1 c    |
| <i>Limonium sinuatum</i> Blue Na <sup>+</sup> + K <sup>+</sup> Concentration (g kg <sup>-1</sup> ) |                |               |                |                |               |               |             |
| Control                                                                                            | 1.30 ± 0.04 f  | 0.48 ± 0.04 d | 0.39 ± 0.02 e  | 0.45 ± 0.01 c  | 0.28 ± 0.01 c | –             | –           |
| NaCl                                                                                               | 3.57 ± 0.06 bc | 3.68 ± 0.13 a | 2.14 ± 0.23 b  | 0.86 ± 0.05 ab | 0.57 ± 0.03 b | –             | –           |
| KCl                                                                                                | 5.09 ± 0.34 a  | 3.98 ± 0.19 a | 2.69 ± 0.13 a  | 1.02 ± 0.02 a  | 0.84 ± 0.09 a | –             | –           |
| NaHCO <sub>3</sub>                                                                                 | 2.42 ± 0.11 de | 1.52 ± 0.04 c | 1.17 ± 0.03 d  | 0.81 ± 0.04 b  | 0.15 ± 0.01 c | –             | –           |
| NaNO <sub>3</sub>                                                                                  | 3.82 ± 0.23 b  | 3.64 ± 0.33 a | 1.70 ± 0.09 bc | 0.88 ± 0.05 ab | 0.48 ± 0.01 b | –             | –           |

| Treatment                                                                                            | Dry Leaves     | Large Leaves   | Middle Leaves  | New Leaves      | Roots          | Flower Stalks  | Flowers         |
|------------------------------------------------------------------------------------------------------|----------------|----------------|----------------|-----------------|----------------|----------------|-----------------|
| Na <sub>2</sub> HPO <sub>4</sub>                                                                     | 2.22 ± 0.04 e  | 1.73 ± 0.11 bc | 1.47 ± 0.12 cd | 0.80 ± 0.07 b   | 0.26 ± 0.02 c  | —              | —               |
| Na <sub>2</sub> SO <sub>4</sub>                                                                      | 3.01 ± 0.13 cd | 2.21 ± 0.04 b  | 1.24 ± 0.04 cd | 0.80 ± 0.04 b   | 0.47 ± 0.03 b  | —              | —               |
| <i>Limonium sinuatum</i> Yellow Na <sup>+</sup> + K <sup>+</sup> Concentration (g kg <sup>-1</sup> ) |                |                |                |                 |                |                |                 |
| Control                                                                                              | 1.21 ± 0.16 e  | 0.67 ± 0.05 e  | 0.46 ± 0.06 e  | 0.53 ± 0.02 d   | 0.49 ± 0.04 bc | 0.58 ± 0.05 c  | 0.49 ± 0.02 d   |
| NaCl                                                                                                 | 3.71 ± 0.45 bc | 3.20 ± 0.19 bc | 2.76 ± 0.36 bc | 1.87 ± 0.24 b   | 0.84 ± 0.09 bc | 1.20 ± 0.14 b  | 0.88 ± 0.08 b   |
| KCl                                                                                                  | 5.19 ± 0.40 a  | 6.66 ± 0.60 a  | 5.50 ± 0.40 a  | 3.31 ± 0.27 a   | 0.80 ± 0.04 bc | 3.17 ± 0.25 a  | 1.66 ± 0.08 a   |
| NaHCO <sub>3</sub>                                                                                   | 2.09 ± 0.16 de | 1.34 ± 0.10 de | 1.08 ± 0.06 de | 1.21 ± 0.06 bcd | 0.31 ± 0.09 c  | 0.78 ± 0.03 bc | —               |
| NaNO <sub>3</sub>                                                                                    | 4.63 ± 0.39 ab | 4.14 ± 0.28 b  | 3.75 ± 0.36 b  | 1.59 ± 0.27 bc  | 1.26 ± 0.18 a  | 0.91 ± 0.08 bc | 0.80 ± 0.02 bc  |
| Na <sub>2</sub> HPO <sub>4</sub>                                                                     | 1.91 ± 0.09 de | 1.46 ± 0.01 de | 1.19 ± 0.08 de | 0.86 ± 0.06 cd  | 0.29 ± 0.01 c  | 0.76 ± 0.05 bc | 0.71 ± 0.01 bcd |
| Na <sub>2</sub> SO <sub>4</sub>                                                                      | 2.76 ± 0.06 cd | 2.38 ± 0.07 cd | 1.91 ± 0.06 cd | 1.05 ± 0.08 cd  | 0.92 ± 0.01 ab | 0.73 ± 0.03 bc | 0.58 ± 0.07 cd  |
