# Supplementary material
Source: MDPI journal article supplement (https://www.mdpi.com/2037-0164/14/4/83)
Supplement: s1 [file s1]

Table S3. Effect of different salts on electrical conductivity, Na<sup>+</sup> concentration, K<sup>+</sup> concentration and Na<sup>+</sup> + K<sup>+</sup> concentration in different parts of *Lobularia maritima* plants. Data are means from 4 replicates  $\pm$  SE per treatment.

| Treatment                                                              | Leaves             | Stems              | Flower Stalks      | Flowers           | Thick Roots        | Fine Roots        |
|------------------------------------------------------------------------|--------------------|--------------------|--------------------|-------------------|--------------------|-------------------|
| Electrical Conductivity (mS m <sup>-1</sup> )                          |                    |                    |                    |                   |                    |                   |
| Control                                                                | 185 $\pm$ 7 c      | 149 $\pm$ 7 b      | 130 $\pm$ 8 c      | 110 $\pm$ 9 c     | 30 $\pm$ 1 b       | 30 $\pm$ 6 a      |
| NaCl                                                                   | 451 $\pm$ 49 a     | 305 $\pm$ 32 a     | 274 $\pm$ 15 a     | 233 $\pm$ 10 a    | 67 $\pm$ 10 a      | 16 $\pm$ 2 b      |
| NaNO <sub>3</sub>                                                      | 327 $\pm$ 34 ab    | 291 $\pm$ 17 a     | 276 $\pm$ 6 a      | 197 $\pm$ 5 ab    | 56 $\pm$ 7 a       | 18 $\pm$ 5 b      |
| NaHCO <sub>3</sub>                                                     | 210 $\pm$ 22 bc    | 169 $\pm$ 22 b     | 193 $\pm$ 12 b     | 200 $\pm$ 30 ab   | 27 $\pm$ 1 b       | 28 $\pm$ 4 ab     |
| Na <sub>2</sub> SO <sub>4</sub>                                        | 230 $\pm$ 20 bc    | 173 $\pm$ 11 b     | 242 $\pm$ 9 ab     | 174 $\pm$ 25 b    | 40 $\pm$ 7 ab      | 27 $\pm$ 3 ab     |
| Na <sup>+</sup> Concentration (g kg <sup>-1</sup> )                    |                    |                    |                    |                   |                    |                   |
| Control                                                                | 2.5 $\pm$ 0.2 c    | 2.1 $\pm$ 0.3 c    | 1.6 $\pm$ 0.2 c    | 1.1 $\pm$ 0.1 b   | 0.8 $\pm$ 0.1 c    | 0.7 $\pm$ 0.1 d   |
| NaCl                                                                   | 79 $\pm$ 14 a      | 42 $\pm$ 7 a       | 41 $\pm$ 5 a       | 20 $\pm$ 2 a      | 4.6 $\pm$ 0.7 a    | 1.6 $\pm$ 0.3 bc  |
| NaNO <sub>3</sub>                                                      | 62 $\pm$ 11 ab     | 32 $\pm$ 4 ab      | 37 $\pm$ 1 ab      | 23 $\pm$ 1 a      | 4.0 $\pm$ 0.2 a    | 1.4 $\pm$ 0.3 c   |
| NaHCO <sub>3</sub>                                                     | 29 $\pm$ 3 b       | 19 $\pm$ 2 b       | 26 $\pm$ 2 b       | 18 $\pm$ 2 a      | 2.4 $\pm$ 0.2 b    | 2.7 $\pm$ 0.1 a   |
| Na <sub>2</sub> SO <sub>4</sub>                                        | 46 $\pm$ 3 ab      | 26 $\pm$ 4 b       | 46 $\pm$ 2 a       | 24 $\pm$ 7 a      | 4.5 $\pm$ 0.4 a    | 2.6 $\pm$ 0.2 ab  |
| K <sup>+</sup> Concentration (g kg <sup>-1</sup> )                     |                    |                    |                    |                   |                    |                   |
| Control                                                                | 27 $\pm$ 2 a       | 28 $\pm$ 2 ab      | 21 $\pm$ 2 a       | 16 $\pm$ 1 ab     | 7.2 $\pm$ 0.3 bc   | 4.6 $\pm$ 0.9 a   |
| NaCl                                                                   | 14 $\pm$ 2 b       | 30 $\pm$ 2 a       | 20 $\pm$ 1 a       | 25 $\pm$ 2 a      | 14.0 $\pm$ 2.8 a   | 1.4 $\pm$ 0.3 b   |
| NaNO <sub>3</sub>                                                      | 12 $\pm$ 1 bc      | 20 $\pm$ 2 bc      | 11 $\pm$ 1 b       | 11 $\pm$ 2 b      | 9.3 $\pm$ 0.3 ab   | 1.4 $\pm$ 0.6 b   |
| NaHCO <sub>3</sub>                                                     | 7 $\pm$ 1 c        | 12 $\pm$ 2 c       | 9 $\pm$ 2 b        | 19 $\pm$ 5 a      | 4.8 $\pm$ 0.6 c    | 1.7 $\pm$ 0.1 b   |
| Na <sub>2</sub> SO <sub>4</sub>                                        | 9 $\pm$ 1 bc       | 19 $\pm$ 2 c       | 14 $\pm$ 2 ab      | 18 $\pm$ 2 ab     | 8.6 $\pm$ 1.1 b    | 1.9 $\pm$ 0.3 b   |
| Na <sup>+</sup> + K <sup>+</sup> Concentration (mol kg <sup>-1</sup> ) |                    |                    |                    |                   |                    |                   |
| Control                                                                | 0.80 $\pm$ 0.06 c  | 0.80 $\pm$ 0.05 d  | 0.60 $\pm$ 0.05 d  | 0.46 $\pm$ 0.03 b | 0.22 $\pm$ 0.01 c  | 0.15 $\pm$ 0.03 a |
| NaCl                                                                   | 3.81 $\pm$ 0.56 a  | 2.62 $\pm$ 0.31 a  | 2.30 $\pm$ 0.12 ab | 1.49 $\pm$ 0.11 a | 0.56 $\pm$ 0.10 a  | 0.11 $\pm$ 0.02 a |
| NaNO <sub>3</sub>                                                      | 3.00 $\pm$ 0.50 ab | 1.89 $\pm$ 0.12 ab | 1.90 $\pm$ 0.01 b  | 1.25 $\pm$ 0.08 a | 0.41 $\pm$ 0.01 b  | 0.10 $\pm$ 0.03 a |
| NaHCO <sub>3</sub>                                                     | 1.44 $\pm$ 0.13 c  | 1.14 $\pm$ 0.13 cd | 1.35 $\pm$ 0.10 c  | 1.26 $\pm$ 0.22 a | 0.23 $\pm$ 0.01 c  | 0.16 $\pm$ 0.01 a |
| Na <sub>2</sub> SO <sub>4</sub>                                        | 2.23 $\pm$ 0.13 bc | 1.60 $\pm$ 0.13 bc | 2.35 $\pm$ 0.05 a  | 1.52 $\pm$ 0.28 a | 0.42 $\pm$ 0.04 ab | 0.16 $\pm$ 0.02 a |
