# Supplementary material
Source: MDPI journal article supplement (https://www.mdpi.com/2037-0164/14/4/83)
Supplement: s1 [file s1]

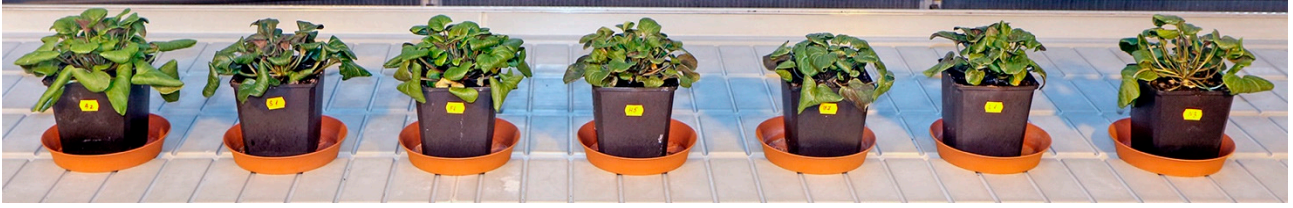

**Figure S1.** Typical *Cochlearia officinalis* plants 3 weeks after the full treatment. From left to right: control, NaCl, Na<sub>2</sub>CO<sub>3</sub>, NaHCO<sub>3</sub>, NaNO<sub>3</sub>, Na<sub>2</sub>HPO<sub>4</sub>, Na<sub>2</sub>SO<sub>4</sub>. 200 mM.

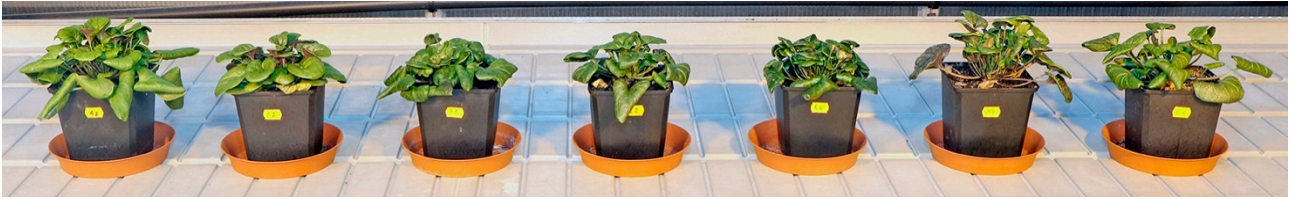

**Figure S2.** Typical *Cochlearia officinalis* plants 3 weeks after the full treatment. From left to right: control, KCl, K<sub>2</sub>CO<sub>3</sub>, KHCO<sub>3</sub>, KNO<sub>3</sub>, K<sub>2</sub>HPO<sub>4</sub>, K<sub>2</sub>SO<sub>4</sub>.

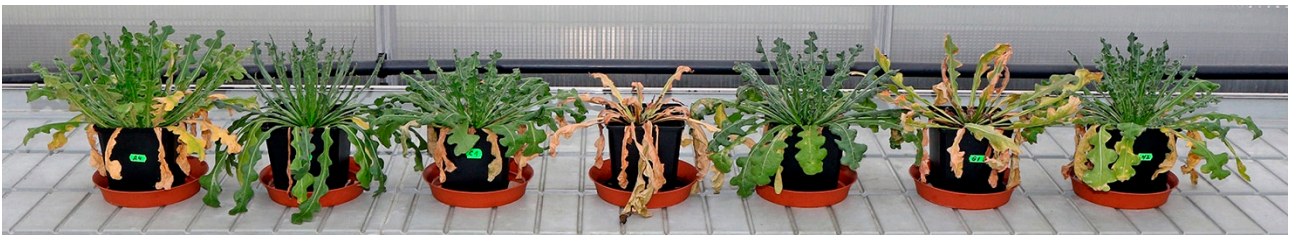

**Figure S3.** Typical *Limonium sinuatum* Blue plants 4 weeks after the full treatment. From left to right: control, NaCl, KCl, NaHCO<sub>3</sub>, NaNO<sub>3</sub>, Na<sub>2</sub>HPO<sub>4</sub>, Na<sub>2</sub>SO<sub>4</sub>.

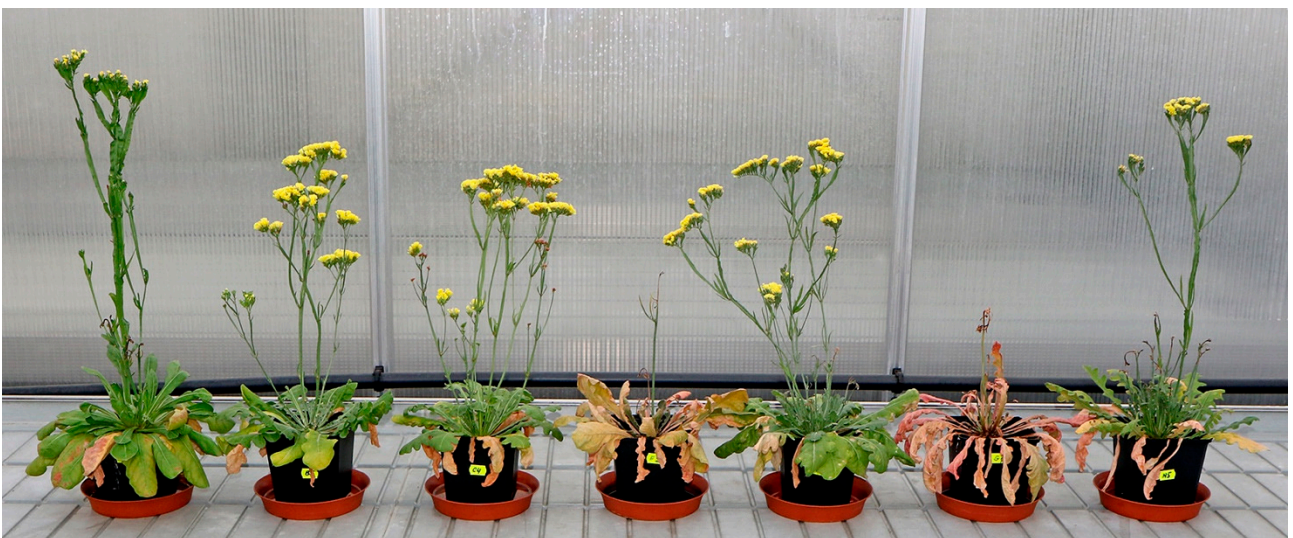

**Figure S4.** Typical *Limonium sinuatum* Yellow plants 4 weeks after the full treatment. From left to right: control, NaCl, KCl, NaHCO<sub>3</sub>, NaNO<sub>3</sub>, Na<sub>2</sub>HPO<sub>4</sub>, Na<sub>2</sub>SO<sub>4</sub>.



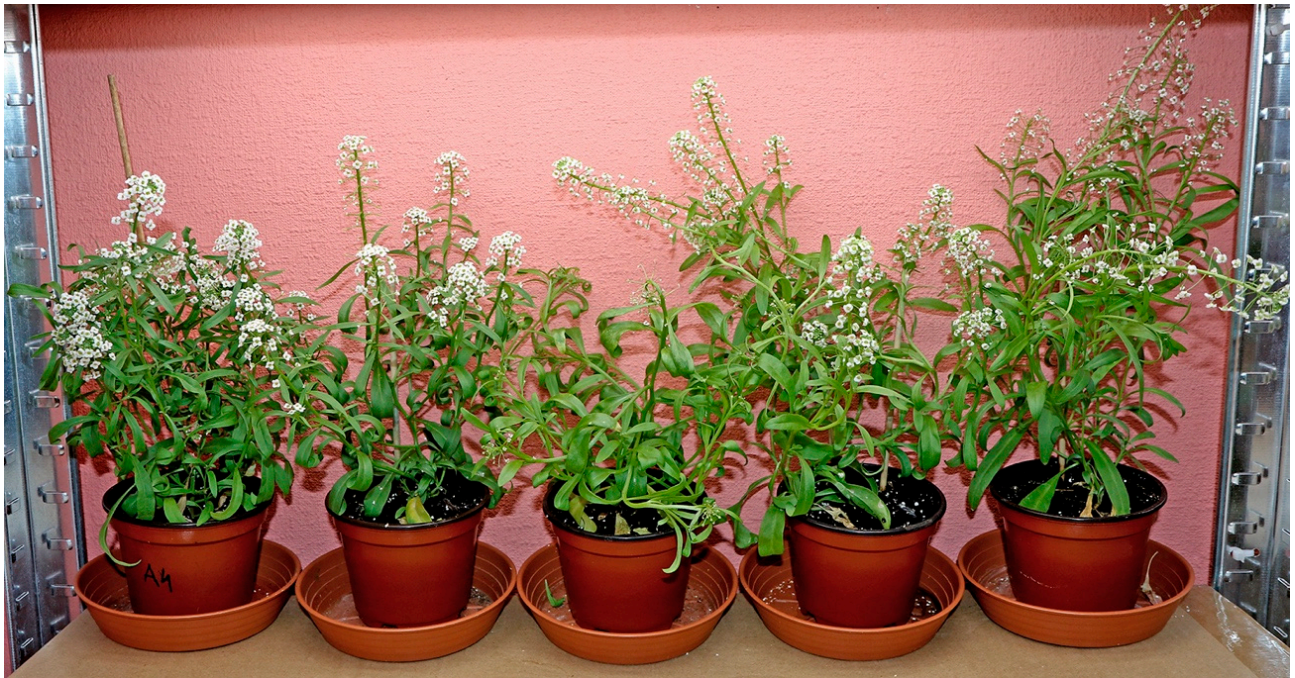

**Figure S5.** Typical *Lobularia maritima* plants 2 weeks after the full treatment. From left to right: control, NaCl, NaNO<sub>3</sub>, NaHCO<sub>3</sub>, Na<sub>2</sub>SO<sub>4</sub>.

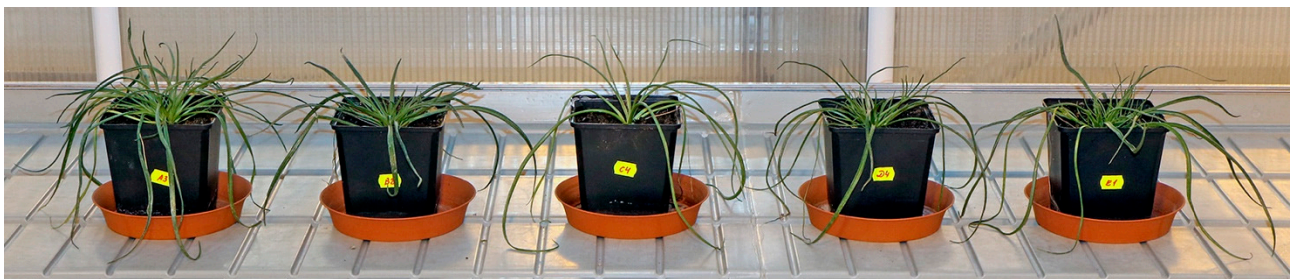

**Figure S6.** Typical *Plantago maritima* plants 3 weeks after the full treatment. From left to right: control, NaCl, NaOAc, NaHCO<sub>3</sub>, NaNO<sub>3</sub>.

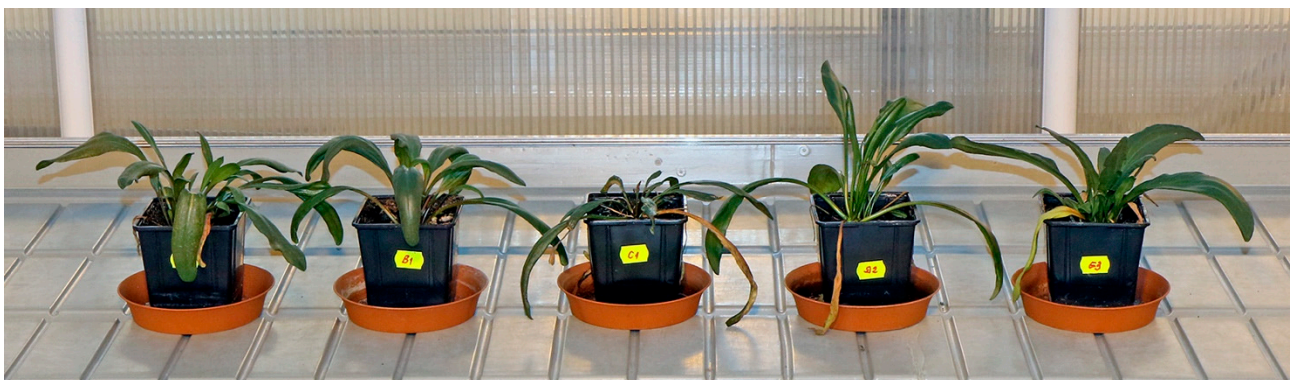

**Figure S7.** Typical *Tripolium pannonicum* plants 3 weeks after the full treatment. From left to right: control, NaCl, NaOAc, NaHCO<sub>3</sub>, NaNO<sub>3</sub>.
