# Supplementary material
Source: MDPI journal article supplement (https://www.mdpi.com/2037-0164/14/4/83)
Supplement: s1 [file s1]

Table S4. Effect of different salts on electrical conductivity, Na<sup>+</sup> concentration, K<sup>+</sup> concentration and Na<sup>+</sup> + K<sup>+</sup> concentration in different parts of *Plantago maritima* and *Tripolium pannonicum* plants. Data are means from 4 replicates  $\pm$  SE per treatment.

| Treatment                                                                                       | Old Leaves        | Middle Leaves     | New Leaves        | Roots              |
|-------------------------------------------------------------------------------------------------|-------------------|-------------------|-------------------|--------------------|
| <i>Plantago maritima</i> Electrical Conductivity (mS m <sup>-1</sup> )                          |                   |                   |                   |                    |
| Control                                                                                         | 143 $\pm$ 8 b     | 133 $\pm$ 9 b     | 107 $\pm$ 10 b    | 31 $\pm$ 3 b       |
| NaCl                                                                                            | 253 $\pm$ 13 a    | 166 $\pm$ 11 ab   | 122 $\pm$ 14 b    | 50 $\pm$ 9 ab      |
| NaOAc                                                                                           | 167 $\pm$ 5 b     | 180 $\pm$ 14 a    | 99 $\pm$ 4 b      | 33 $\pm$ 1 ab      |
| NaHCO <sub>3</sub>                                                                              | 171 $\pm$ 8 b     | 157 $\pm$ 6 ab    | 123 $\pm$ 7 b     | 33 $\pm$ 3 ab      |
| NaNO <sub>3</sub>                                                                               | 219 $\pm$ 8 a     | 178 $\pm$ 14 a    | 172 $\pm$ 11 a    | 52 $\pm$ 3 a       |
| <i>Plantago maritima</i> Na <sup>+</sup> Concentration (g kg <sup>-1</sup> )                    |                   |                   |                   |                    |
| Control                                                                                         | 6.8 $\pm$ 0.5 c   | 7.1 $\pm$ 0.6 c   | 5.2 $\pm$ 0.3 c   | 2.7 $\pm$ 0.4 b    |
| NaCl                                                                                            | 55.9 $\pm$ 6.4 a  | 33.8 $\pm$ 2.5 b  | 27.2 $\pm$ 3.6 ab | 11.1 $\pm$ 2.2 a   |
| NaOAc                                                                                           | 37.3 $\pm$ 2.6 b  | 46.7 $\pm$ 4.4 a  | 26.1 $\pm$ 0.8 b  | 8.9 $\pm$ 0.3 a    |
| NaHCO <sub>3</sub>                                                                              | 42.8 $\pm$ 3.2 ab | 39.6 $\pm$ 2.0 ab | 28.0 $\pm$ 2.0 ab | 7.9 $\pm$ 1.2 a    |
| NaNO <sub>3</sub>                                                                               | 57.7 $\pm$ 3.4 a  | 46.6 $\pm$ 4.4 a  | 37.3 $\pm$ 5.5 a  | 12.6 $\pm$ 1.5 a   |
| <i>Plantago maritima</i> K <sup>+</sup> Concentration (g kg <sup>-1</sup> )                     |                   |                   |                   |                    |
| Control                                                                                         | 29 $\pm$ 3 a      | 30 $\pm$ 3 a      | 21 $\pm$ 3 a      | 10 $\pm$ 1 a       |
| NaCl                                                                                            | 16 $\pm$ 2 b      | 11 $\pm$ 2 b      | 8 $\pm$ 1 b       | 7 $\pm$ 1 ab       |
| NaOAc                                                                                           | 17 $\pm$ 2 b      | 9 $\pm$ 2 b       | 7 $\pm$ 1 b       | 3 $\pm$ 0 c        |
| NaHCO <sub>3</sub>                                                                              | 12 $\pm$ 2 b      | 10 $\pm$ 1 b      | 9 $\pm$ 1 b       | 3 $\pm$ 0 c        |
| NaNO <sub>3</sub>                                                                               | 17 $\pm$ 2 b      | 10 $\pm$ 2 b      | 9 $\pm$ 1 b       | 6 $\pm$ 1 bc       |
| <i>Plantago maritima</i> Na <sup>+</sup> + K <sup>+</sup> Concentration (mol kg <sup>-1</sup> ) |                   |                   |                   |                    |
| Control                                                                                         | 1.03 $\pm$ 0.09 c | 1.07 $\pm$ 0.08 b | 0.76 $\pm$ 0.07 b | 0.36 $\pm$ 0.04 b  |
| NaCl                                                                                            | 2.85 $\pm$ 0.24 a | 1.82 $\pm$ 0.11 a | 1.39 $\pm$ 0.17 a | 0.66 $\pm$ 0.13 a  |
| NaOAc                                                                                           | 2.06 $\pm$ 0.09 b | 2.25 $\pm$ 0.18 a | 1.31 $\pm$ 0.04 a | 0.46 $\pm$ 0.01 ab |
| NaHCO <sub>3</sub>                                                                              | 2.17 $\pm$ 0.15 b | 1.98 $\pm$ 0.09 a | 1.45 $\pm$ 0.09 a | 0.43 $\pm$ 0.06 ab |
| NaNO <sub>3</sub>                                                                               | 2.93 $\pm$ 0.17 a | 2.29 $\pm$ 0.22 a | 1.86 $\pm$ 0.25 a | 0.69 $\pm$ 0.06 a  |
| <i>Tripolium pannonicum</i> Electrical Conductivity (mS m <sup>-1</sup> )                       |                   |                   |                   |                    |
| Control                                                                                         | 81 $\pm$ 9 c      | 60 $\pm$ 3 c      | 39 $\pm$ 3 c      | 39 $\pm$ 2 b       |
| NaCl                                                                                            | 150 $\pm$ 12 ab   | 128 $\pm$ 9 ab    | 116 $\pm$ 11 a    | 45 $\pm$ 3 b       |
| NaOAc                                                                                           | 160 $\pm$ 20 ab   | 79 $\pm$ 4 bc     | 61 $\pm$ 1 bc     | 59 $\pm$ 2 ab      |
| NaHCO <sub>3</sub>                                                                              | 112 $\pm$ 8 bc    | 74 $\pm$ 8 c      | 50 $\pm$ 8 c      | 46 $\pm$ 4 b       |
| NaNO <sub>3</sub>                                                                               | 193 $\pm$ 22 a    | 157 $\pm$ 17 a    | 106 $\pm$ 8 ab    | 64 $\pm$ 7 a       |
| <i>Tripolium pannonicum</i> Na <sup>+</sup> Concentration (g kg <sup>-1</sup> )                 |                   |                   |                   |                    |
| Control                                                                                         | 10.1 $\pm$ 0.3 b  | 9.1 $\pm$ 0.6 c   | 5.8 $\pm$ 1.0 c   | 11.4 $\pm$ 1.2 b   |
| NaCl                                                                                            | 47.1 $\pm$ 7.6 a  | 41.3 $\pm$ 4.0 a  | 31.5 $\pm$ 2.2 a  | 16.2 $\pm$ 1.2 b   |
| NaOAc                                                                                           | 57.5 $\pm$ 2.5 a  | 22.5 $\pm$ 0.5 b  | 15.3 $\pm$ 0.3 b  | 13.3 $\pm$ 0.8 b   |
| NaHCO <sub>3</sub>                                                                              | 40.0 $\pm$ 3.6 a  | 28.0 $\pm$ 2.2 b  | 13.5 $\pm$ 1.6 b  | 17.1 $\pm$ 0.9 b   |
| NaNO <sub>3</sub>                                                                               | 58.4 $\pm$ 5.6 a  | 48.8 $\pm$ 2.3 a  | 27.8 $\pm$ 2.6 a  | 26.3 $\pm$ 2.4 a   |
| <i>Tripolium pannonicum</i> K <sup>+</sup> Concentration (g kg <sup>-1</sup> )                  |                   |                   |                   |                    |

| Treatment                                                                                           | Old Leaves    | Middle Leaves | New Leaves     | Roots          |
|-----------------------------------------------------------------------------------------------------|---------------|---------------|----------------|----------------|
| Control                                                                                             | 29.1 ± 3.0 a  | 19.9 ± 3.2 ab | 12.4 ± 1.4 ab  | 8.8 ± 0.6 a    |
| NaCl                                                                                                | 39.4 ± 3.5 a  | 23.3 ± 5.3 a  | 17.0 ± 1.2 a   | 6.7 ± 0.9 a    |
| NaOAc                                                                                               | 44.0 ± 1.5 a  | 15.5 ± 1.5 ab | 12.3 ± 0.3 ab  | 10.5 ± 0 a     |
| NaHCO <sub>3</sub>                                                                                  | 12.1 ± 1.8 b  | 7.4 ± 0.5 b   | 9.4 ± 1.1 b    | 8.0 ± 1.1 a    |
| NaNO <sub>3</sub>                                                                                   | 34.3 ± 1.3 a  | 17.6 ± 2.7 ab | 11.9 ± 1.0 b   | 7.1 ± 0.7 a    |
| <i>Triplolium pannonicum</i> Na <sup>+</sup> + K <sup>+</sup> Concentration (mol kg <sup>-1</sup> ) |               |               |                |                |
| Control                                                                                             | 1.20 ± 0.09 c | 0.91 ± 0.11 b | 0.57 ± 0.08 c  | 0.72 ± 0.07 b  |
| NaCl                                                                                                | 3.06 ± 0.40 a | 2.40 ± 0.28 a | 1.81 ± 0.12 a  | 0.88 ± 0.07 ab |
| NaOAc                                                                                               | 3.63 ± 0.15 a | 1.38 ± 0.05 b | 0.98 ± 0.01 bc | 0.85 ± 0.03 ab |
| NaHCO <sub>3</sub>                                                                                  | 2.05 ± 0.14 b | 1.41 ± 0.09 b | 0.83 ± 0.09 c  | 0.95 ± 0.06 ab |
| NaNO <sub>3</sub>                                                                                   | 3.42 ± 0.26 a | 2.57 ± 0.16 a | 1.51 ± 0.12 ab | 1.33 ± 0.11 a  |
